# Supplementary material
Source: PubMed Central journal article supplement (PMC1914137)

**mBBr  
fluorescence**

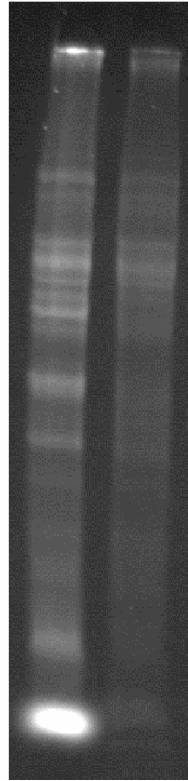

**1 2**

**Coomassie  
blue staining**

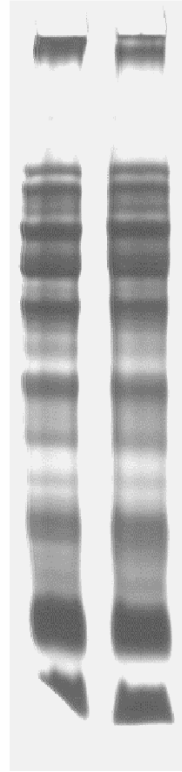

**1 2**

Supplement: plntphys_pp.107.098103_1.pdf [file plntphys_pp.107.098103_1.pdf]
